# Supplementary material for: Health Impact of Air Pollution from Shipping in the Baltic Sea: Effects of Different Spatial Resolutions in Sweden
Source: MDPI journal article supplement (doi:10.3390/ijerph17217963), 2020-10-29
Supplement: s1 [file s1]

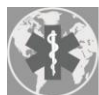

## Supplementary Information

### 2.4. Exposure-response function and mortality calculation

Premature mortality was calculated as a linear function of the exposure response function:

$$Y = (RR-1)/RR \times B \times 0.95 \quad (1)$$

Where Y is the number of extra premature deaths,

RR-1/RR is the population attributable fraction (PAF),

B the baseline mortality rate.

Years of life lost (YLL) calculations used the following equation:

$$Y_{\text{county}} = (Y \times n \times e) / (N \times E) \quad (2)$$

Where Y is YLL for all Sweden,

n is the number of people living in the county,

e is the average exposure ( $\mu\text{g}/\text{m}^3$ ) for the year,

N is the population of Sweden as a whole,

E is the average population exposure ( $\mu\text{g}/\text{m}^3$ ) in per county Sweden for the year

### 2.6. Morbidity calculations

According to the World Health Organization, the burden of disease in terms of DALY in the general population is expressed as the equation

$$\text{DALY} = \text{YLL} + \text{YLD} \quad (3) [1]$$

Where YLL includes all of Sweden,

YLD is years lost due to disability.

To estimate the number of productive years lost due to the disease

$$\text{YLD} = I \times \text{DW} \times D \quad (4)$$

Where, I = number of incident cases,

DW = disability weight. DW is associated with each health condition and lies on a scale of 0 (indicating optimal health) to 1 (indicating a condition equivalent to death). For the purpose of this study the DW used for MI and stroke were obtained from Salomon et al. [2].

D = average duration of the case until remission or death (years). The average duration for stroke and MI was obtained from Eriksson et al. [3].

**Table 1.** Summary of Baltic Sea ship and for the smaller domain around Gothenburg area emissions during 2014 and 2016.

| <b>Baltic<br/>Sea</b>   | <b>Main_Fuel</b>         | <b>AUX_Fuel</b>             | <b>NOx *</b> | <b>SOx **</b> | <b>PM<sub>2.5</sub></b> | <b>CO</b> | <b>CO<sub>2</sub></b>    | <b>Travel</b>        | <b>Transport<br/>Work</b>  | <b>VOC</b> | <b>SHIPS</b> |
|-------------------------|--------------------------|-----------------------------|--------------|---------------|-------------------------|-----------|--------------------------|----------------------|----------------------------|------------|--------------|
|                         | [10 <sup>3</sup> tonnes] | [10 <sup>3</sup><br>tonnes] | [tonnes]     | [tonnes]      | [tonnes]                | [tonnes]  | [10 <sup>3</sup> tonnes] | [10 <sup>3</sup> km] | [10 <sup>6</sup> tonne km] | [tonnes]   |              |
| <b>Baltic Sea, 2014</b> | 3705                     | 1025                        | 312946       | 75148         | 15002                   | 4870      | 14380                    | 137963               | 966574                     | 2554       | 20159        |
| <b>Baltic Sea, 2016</b> | 3635                     | 1167                        | 315893       | 9727          | 9390                    | 4881      | 14594                    | 139205               | 998660                     | 2612       | 22575        |
| <b>Gothenburg, 2014</b> | 121                      | 58                          | 11998        | 2579          | 540                     | 826       | 545                      | 5370                 | 31800                      | 96         | 8507         |
| <b>Gothenburg, 2016</b> | 130                      | 69                          | 13226        | 404           | 388                     | 932       | 604                      | 6007                 | 35290                      | 107        | 9328         |

\*NOx calculated as NO<sub>2</sub>; \*\*SOx calculated as SO<sub>2</sub>.

1

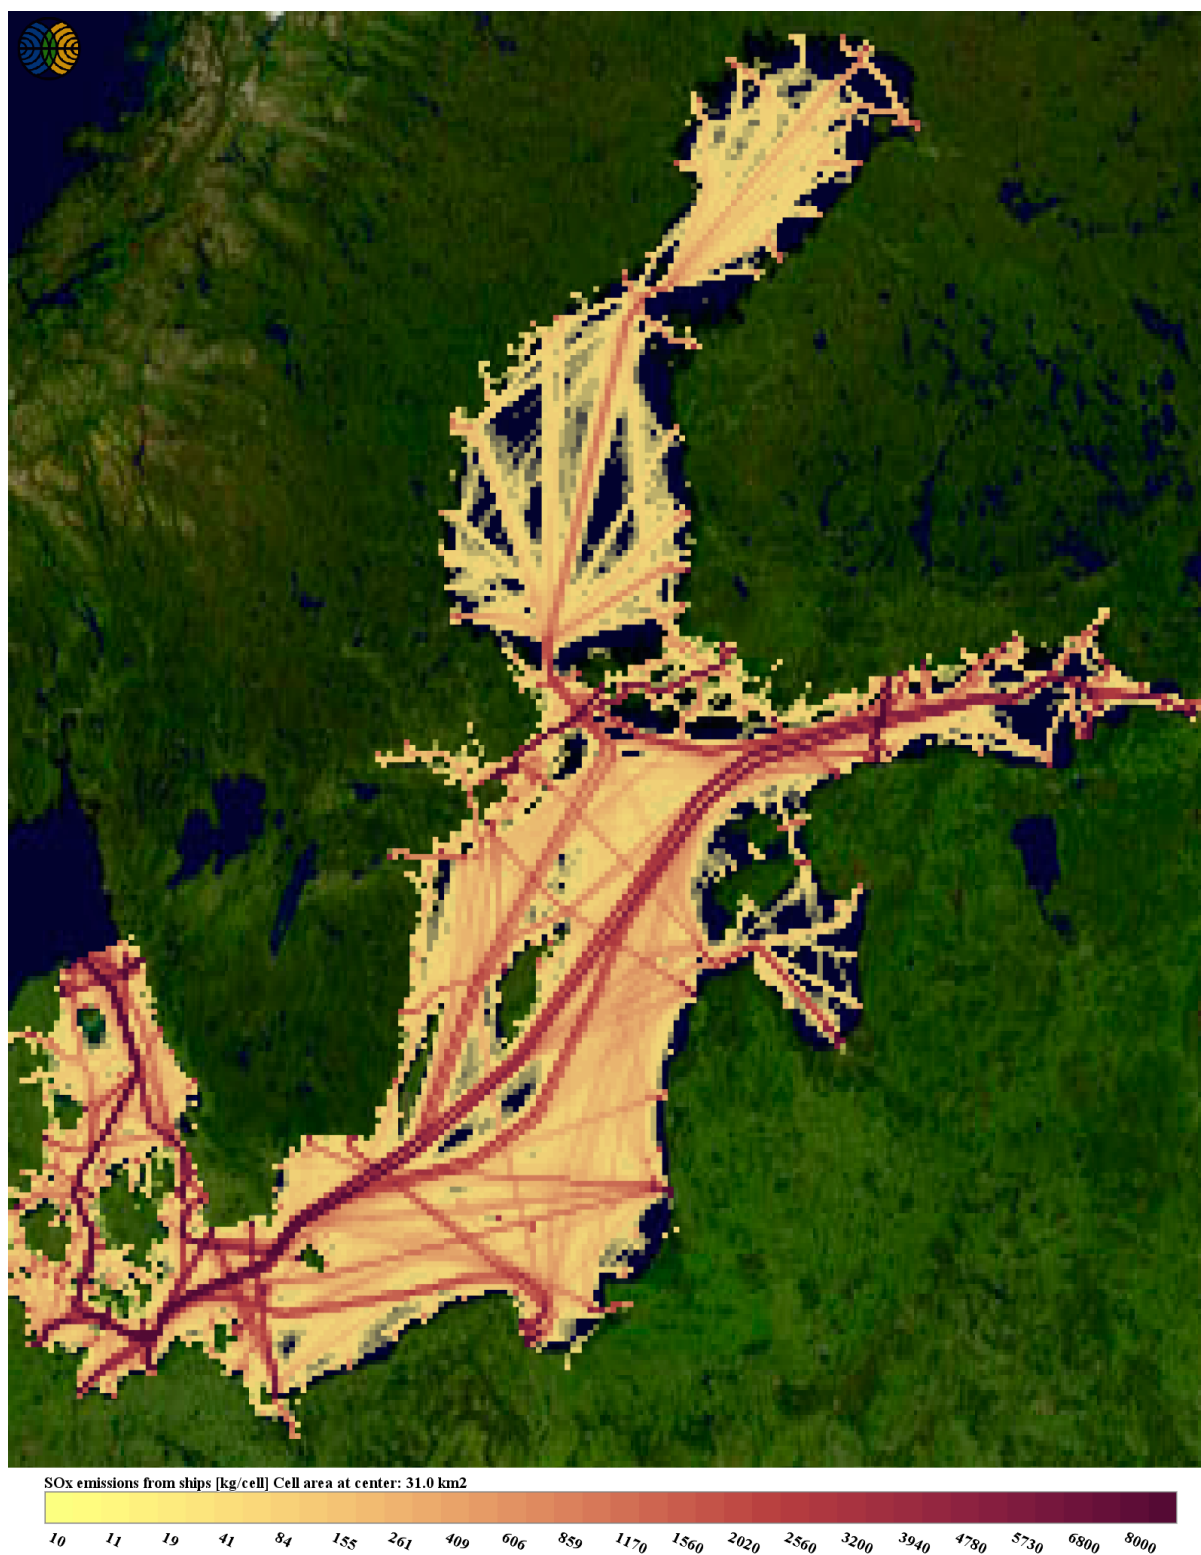

2

3

4

5

**Figure S1.** Emissions of SO<sub>x</sub> from Baltic Sea shipping in 2016. The unit of emissions is kg per grid cell area. Total SO<sub>x</sub> emissions during 2016 were 9727 tonnes, down from 75148 tonnes during 2014. This reduction was because of 0.1%S required in the Baltic Sea SECA.

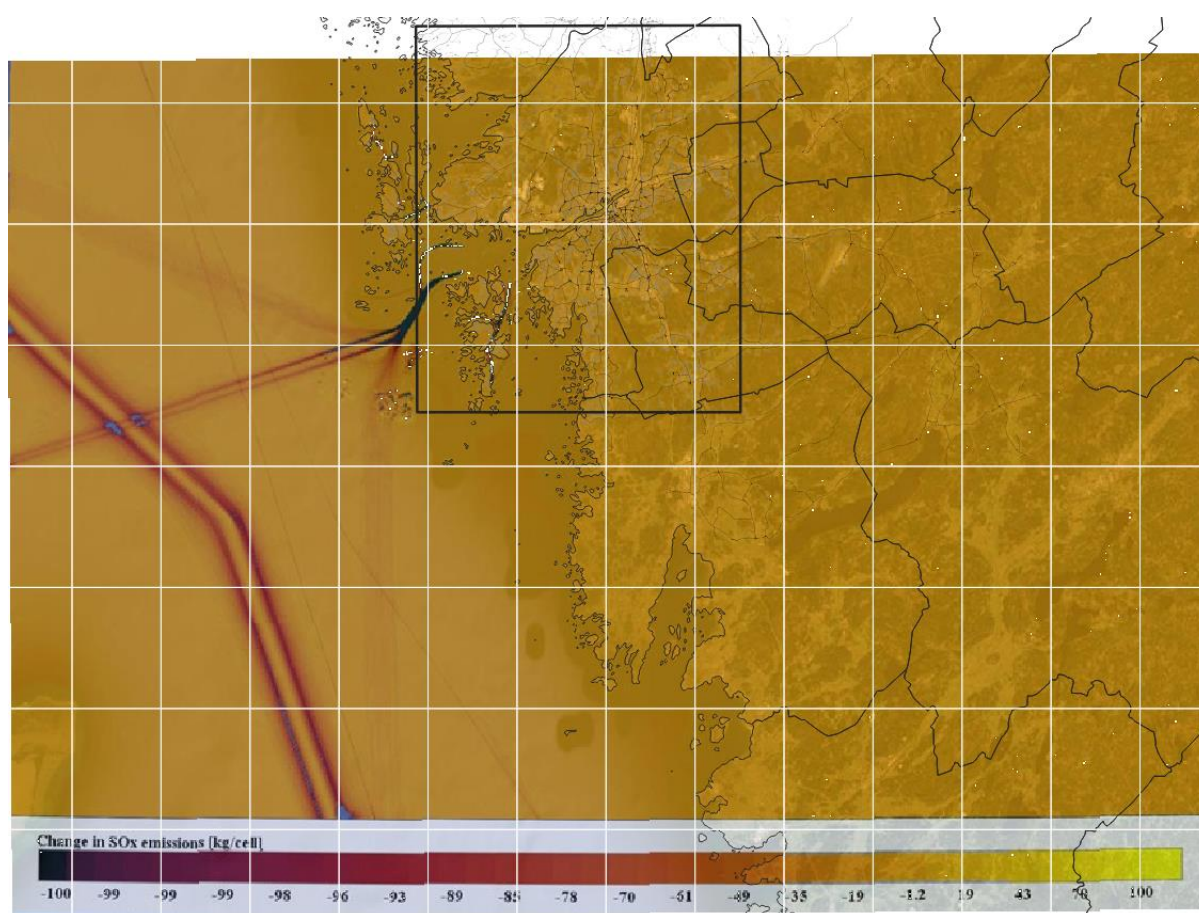

**Figure S2.** Difference plot of SOx emissions in 2014-2016. Note, that reduction of emissions because of policy changes happens outside the Gothenburg harbor area. In the harbor area, no major difference is found, because the requirement to use 0.1%S fuel in harbor areas has been in place since 2010. The domain indicated by this image refers to Gothenburg area referred in the above table. Image courtesy of Landsat-8 and US Geological Survey. In this figure, we have also indicated the city-scale modelling border area (the black rectangle) and the grid of the regional EMEP model (white rectangles).

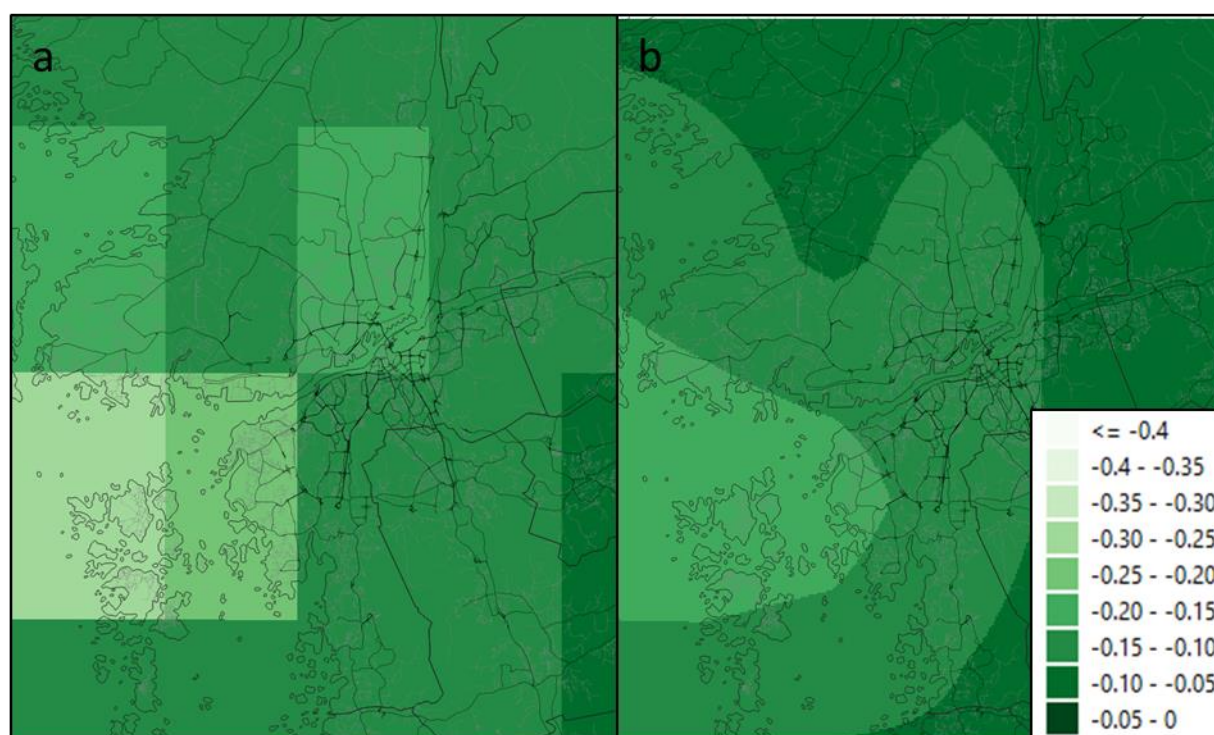

**Figure S3.** Comparison differences in the contributions from Baltic Sea shipping in high- and low-sulfur on PM<sub>2.5</sub> (µg/m<sup>3</sup>) to Gothenburg; (a) regional model, (b) city-scale model.

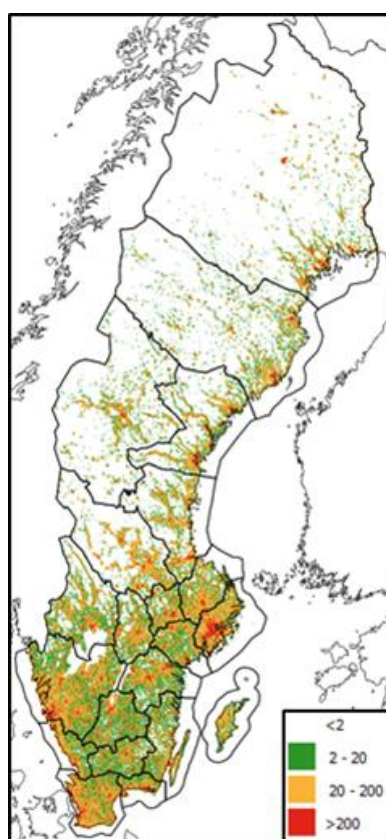

**Figure S4.** Population density in Sweden per km<sup>2</sup>.

## 20 Reference

- 21 1. World Health Organization. Metrics: Disability-Adjusted Life Year (DALY). Available online:  
22 [https://www.who.int/healthinfo/global\\_burden\\_disease/metrics\\_daly/en/2020](https://www.who.int/healthinfo/global_burden_disease/metrics_daly/en/2020). (accessed on 14 April 2020).
- 23 2. Salomon, J.A.; Haagsma, J.A.; Davis, A.; De Noordhout, C.M.; Polinder, S.; Havelaar, A.H.; Cassini, A.;  
24 Devleeschauwer, B.; Kretzschmar, M.; Speybroeck, N.; et al. Disability weights for the Global Burden of  
25 Disease 2013 study. *Lancet Glob. Health*. **2015**, *3*, 712–723.
- 26 3. Eriksson, C.; Bodin, T.; Selander, J. Burden of disease from road traffic and railway noise—A quantification  
27 of healthy life years lost in Sweden. *Scand. J. Work Environ. Health* **2017**, *43*, 519–525.

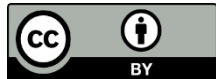

© 2020 by the authors. Licensee MDPI, Basel, Switzerland. This article is an open access article distributed under the terms and conditions of the Creative Commons Attribution (CC BY) license (<http://creativecommons.org/licenses/by/4.0/>).
